# Supplementary material for: Lycium barbarum polysaccharide improves the cognitive deficits in APP/PS1 mice of Alzheimer’s disease via modulating the microbiota-gut-brain axis
Source: Research Square preprint supplement (doi:10.21203/rs.3.rs-8188423/v1), 2025-12-18

**Full uncropped Gels and Blots image(s) as follows:**

**I、APP**

1. APP and GAPDH


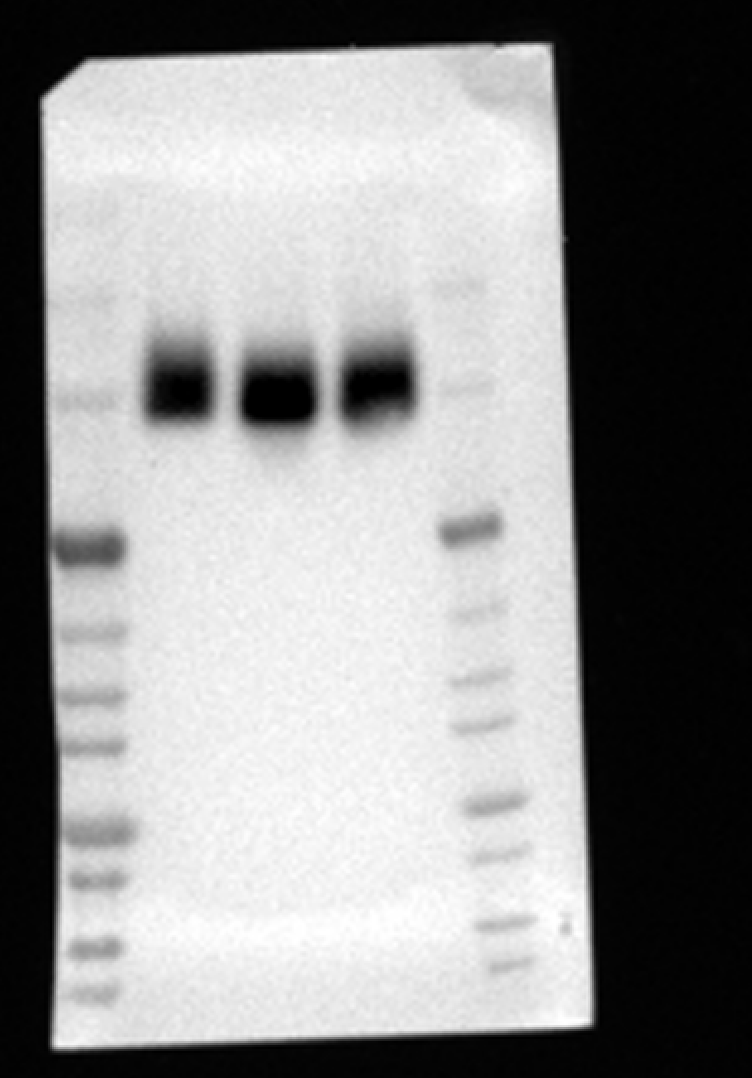

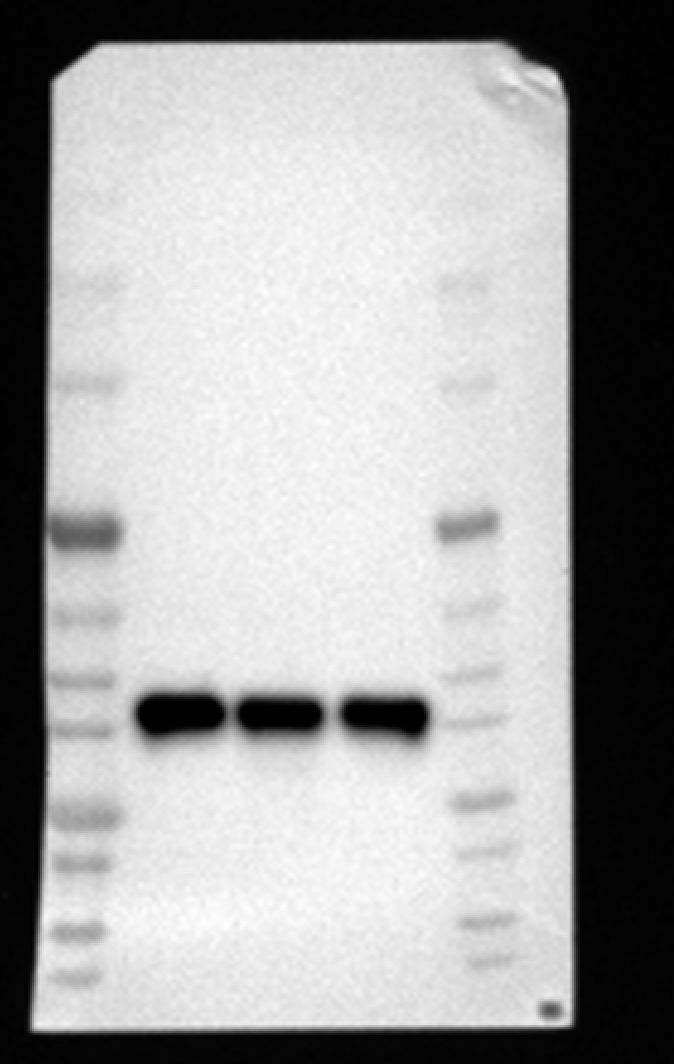


1. APP and GAPDH


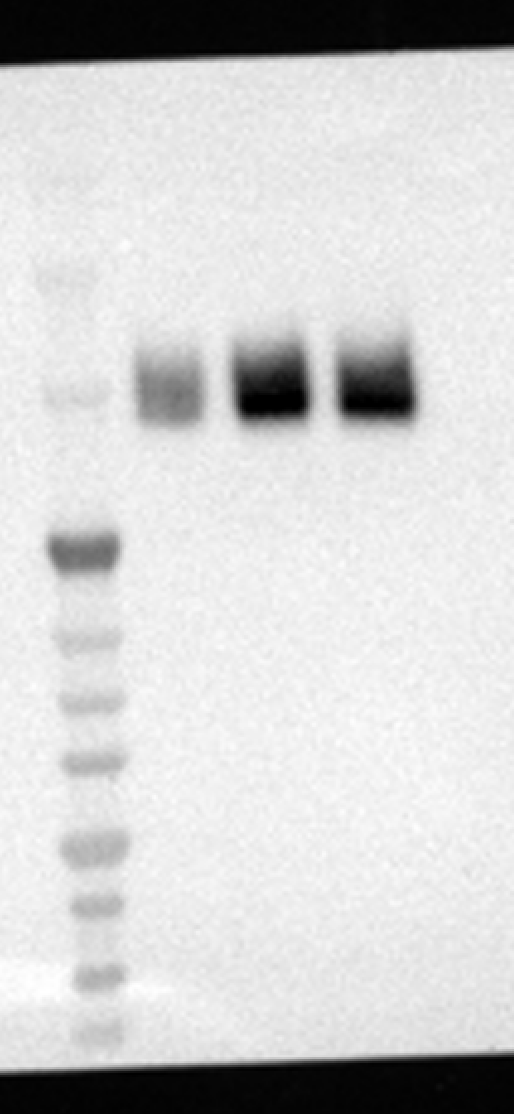

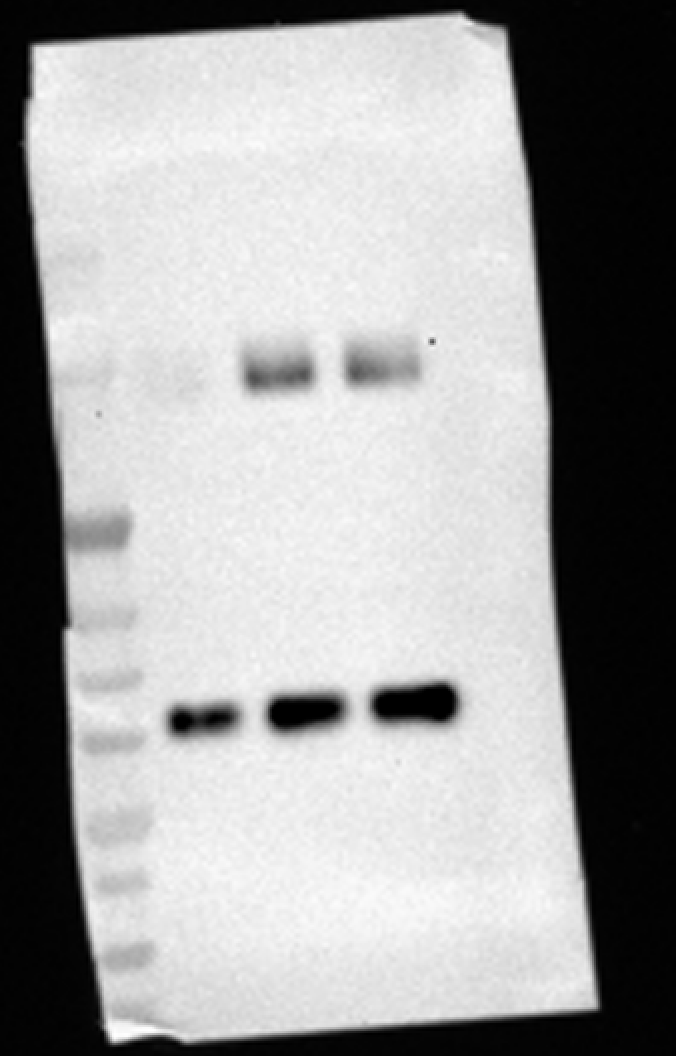


1. APP and GAPDH


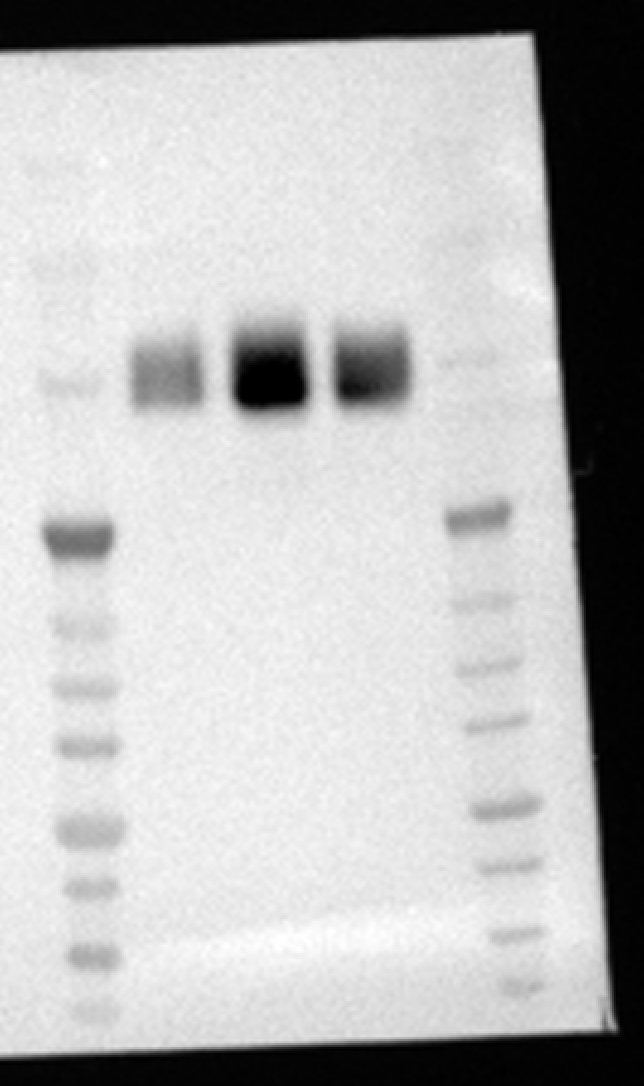

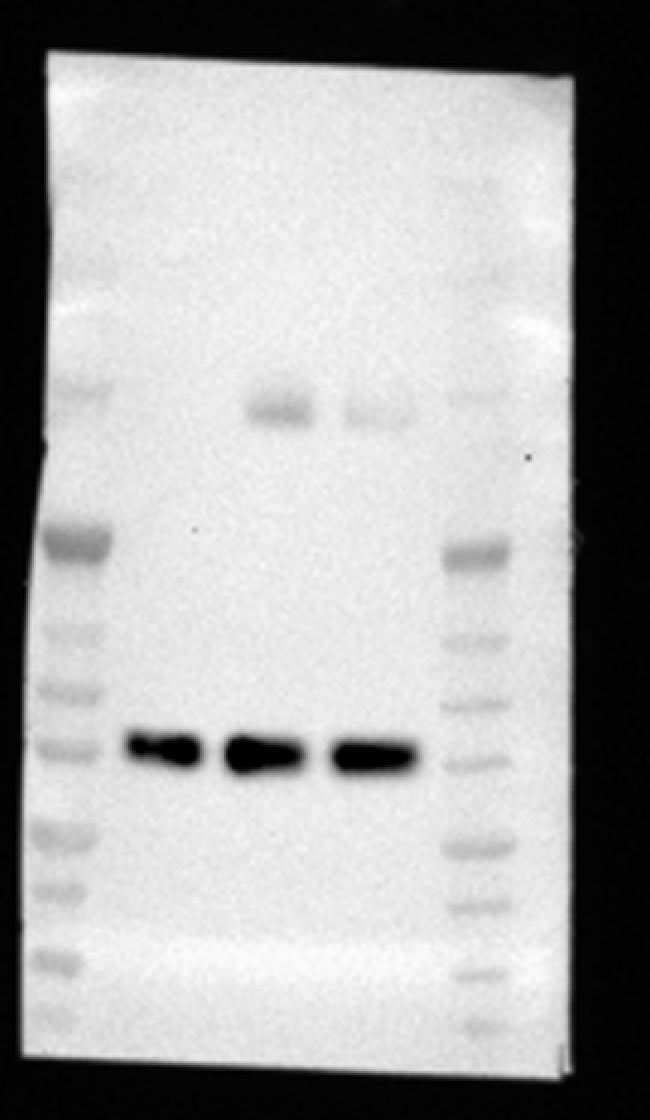


**II、p-APP**

1、p-APP and GAPDH


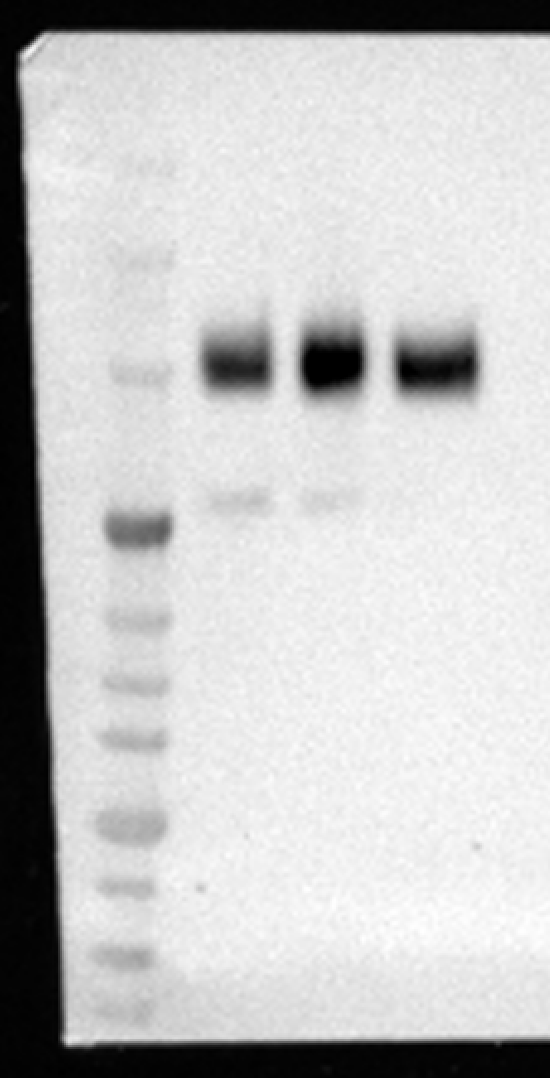

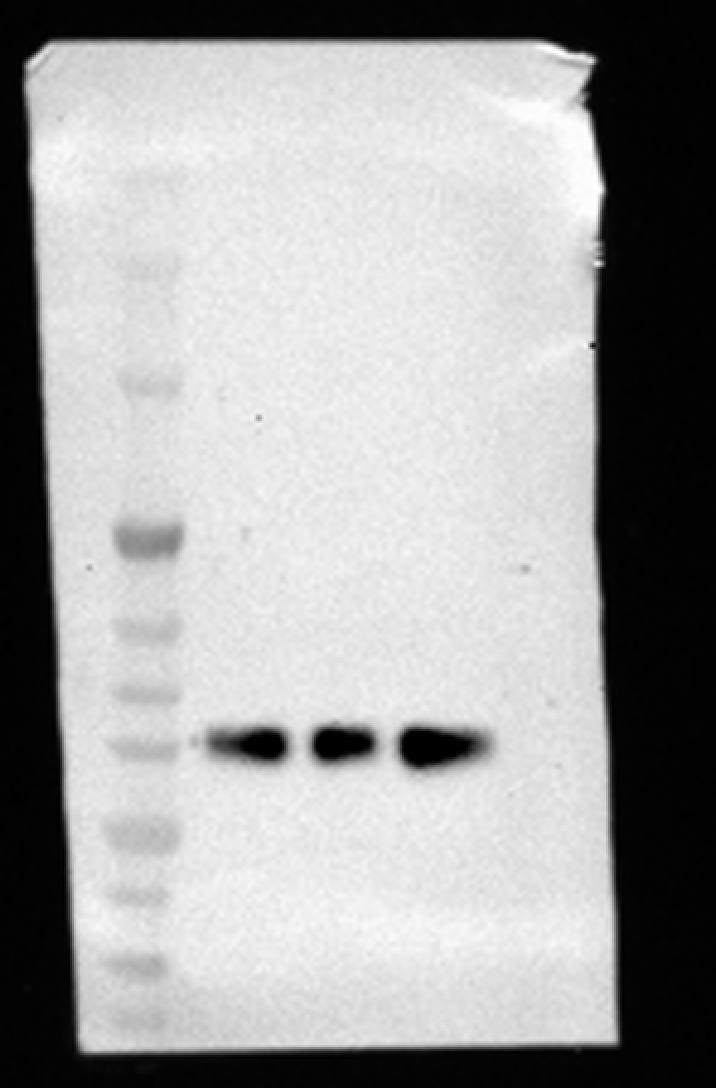


2、p-APP and GAPDH


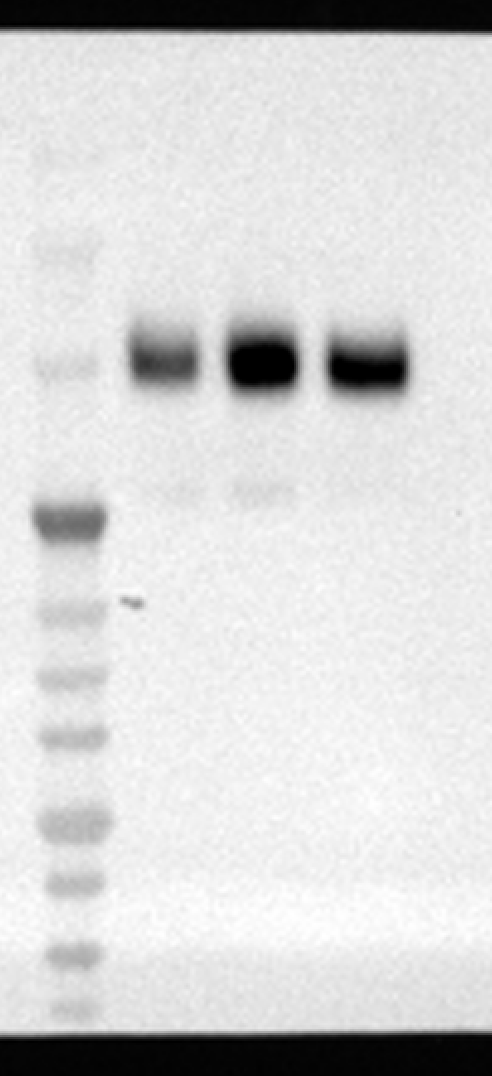

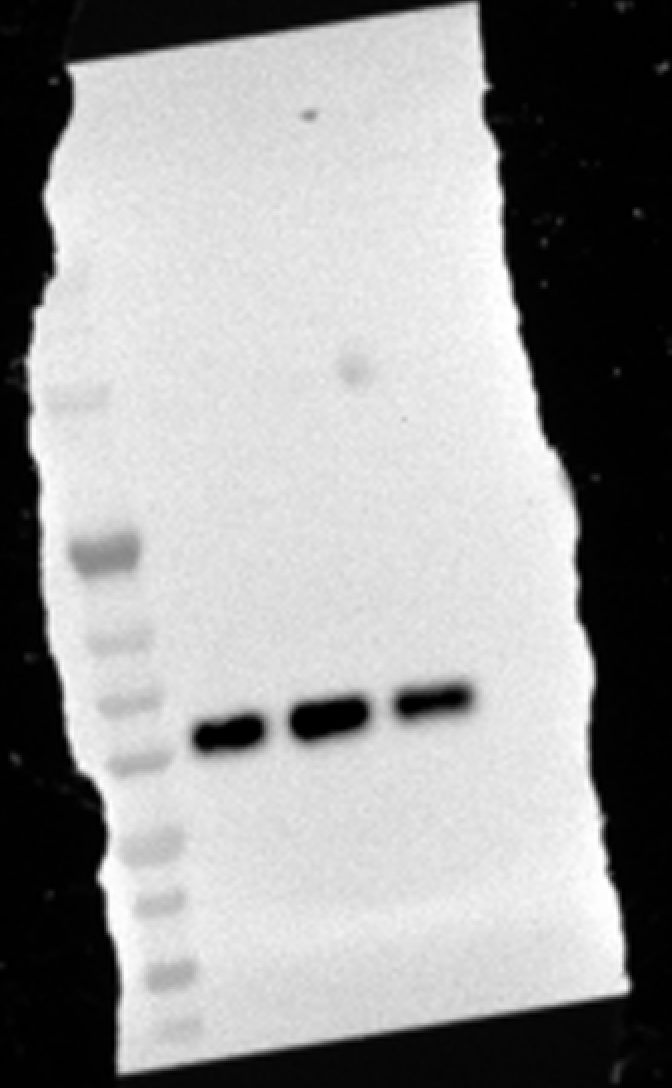


3、p-APP and GAPDH


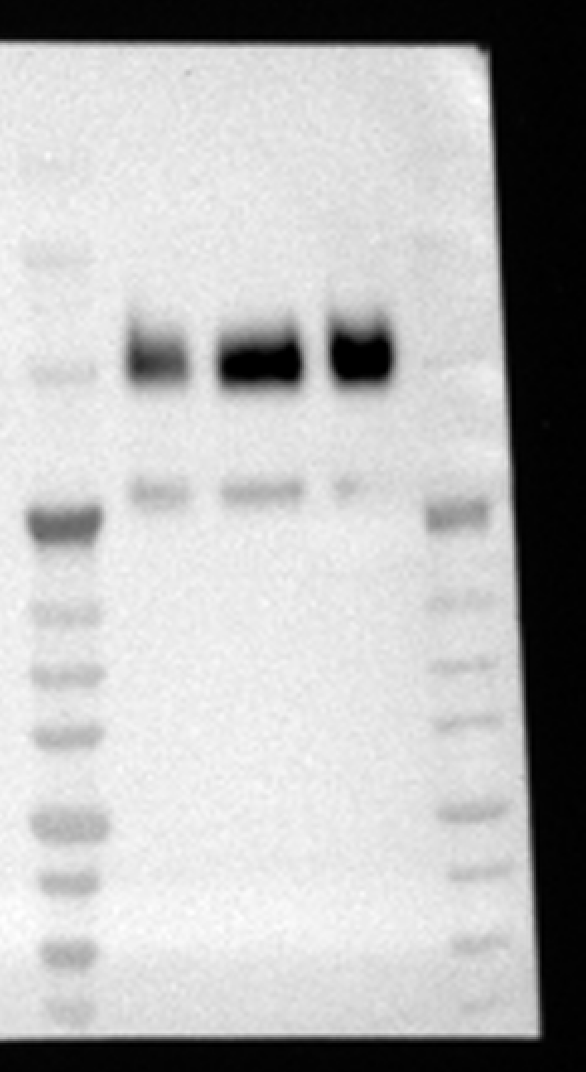

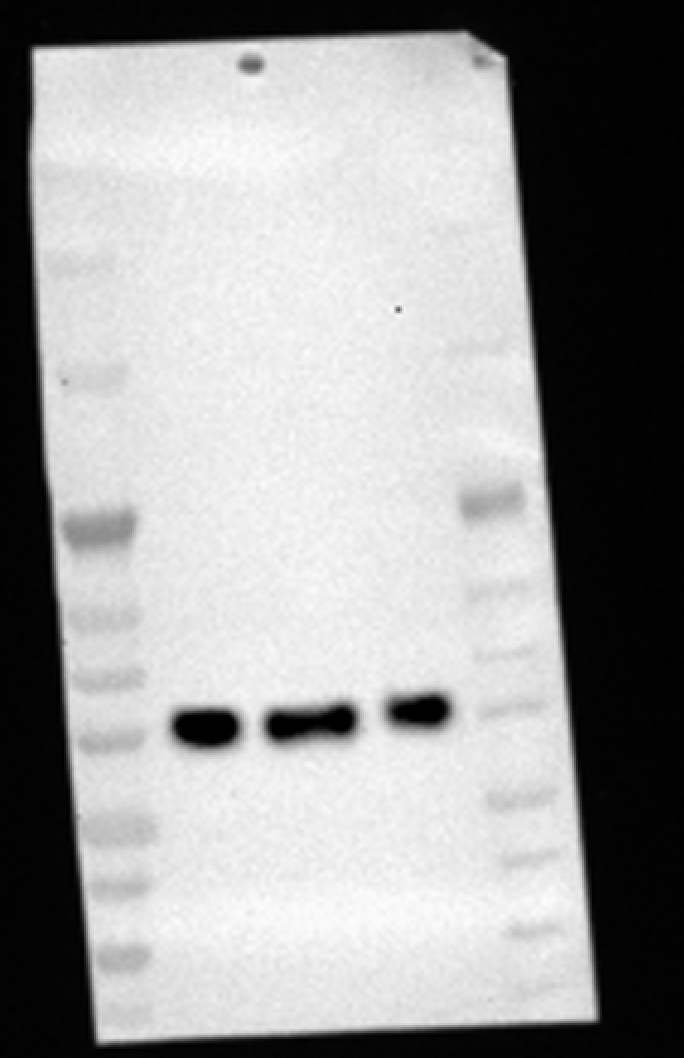


**III、BACE1**

1、BACE1 and GAPDH


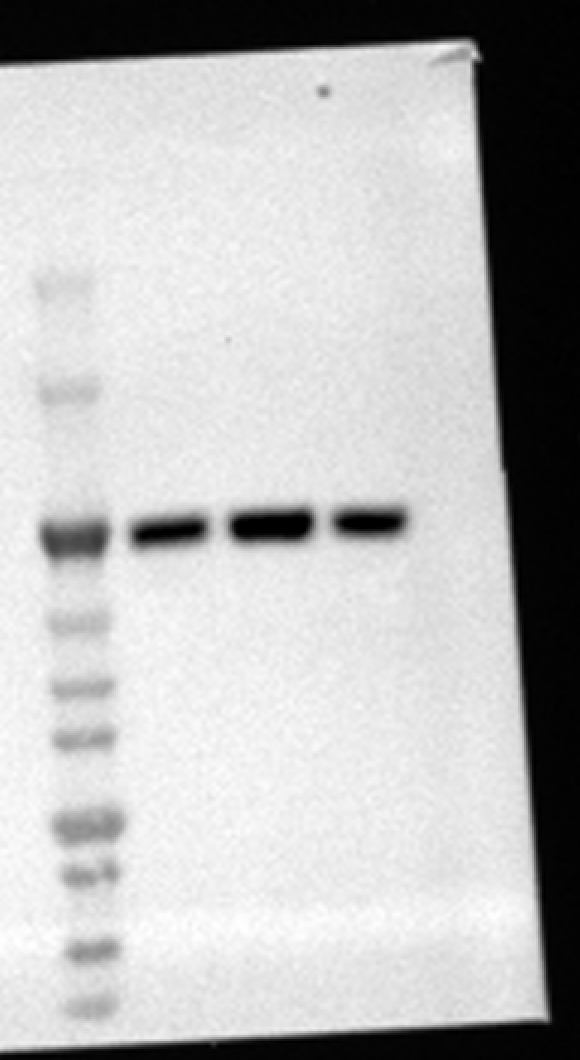

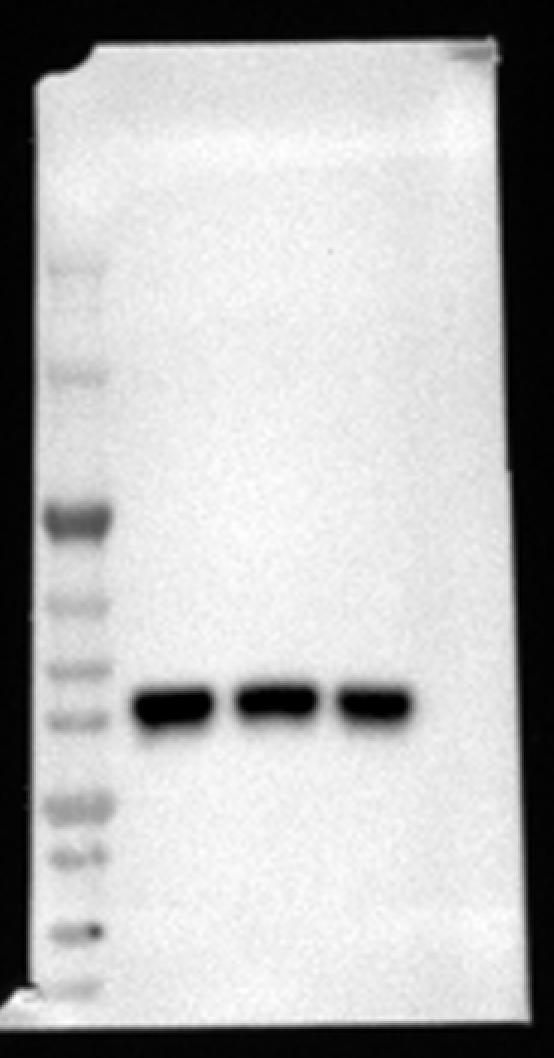


1. BACE1 and GAPDH


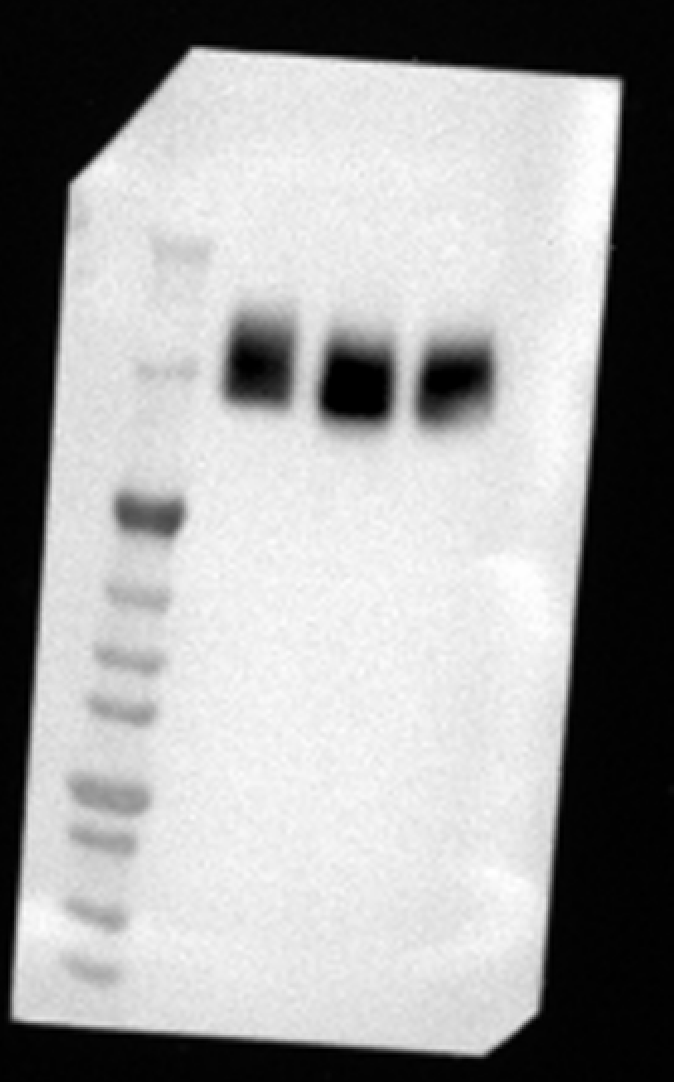

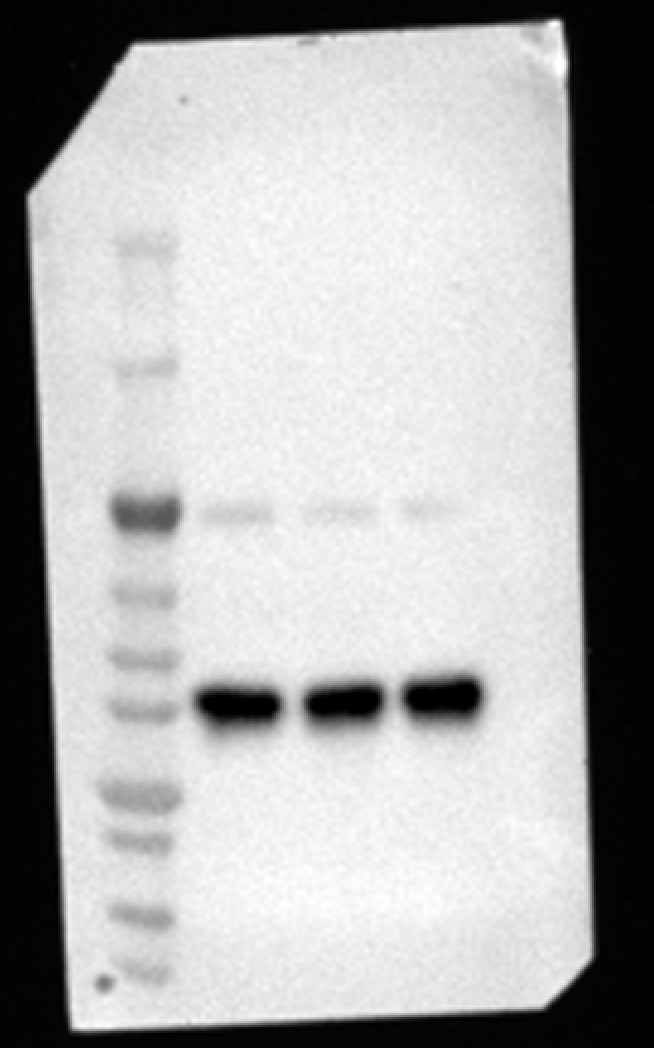


1. BACE1 and GAPDH


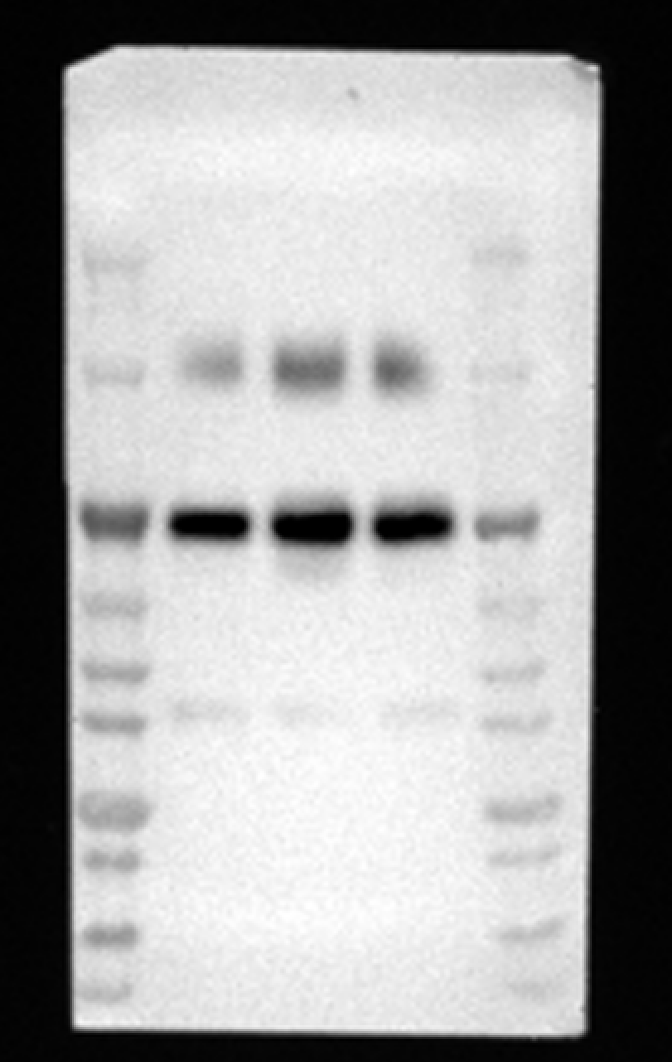

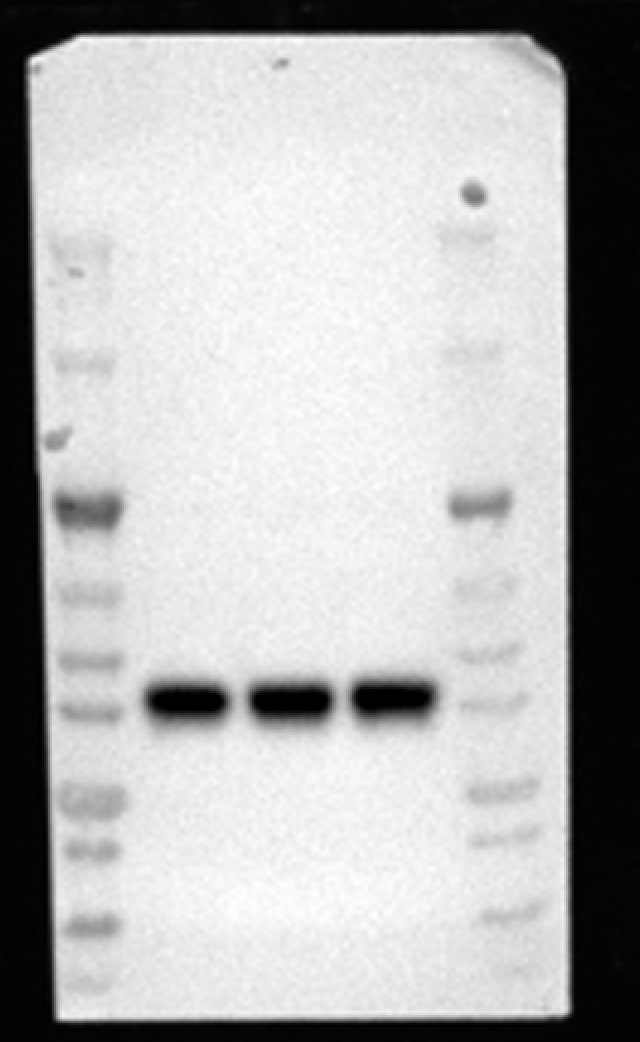


**IV、ADAM10**

1、ADAM10 and GAPDH


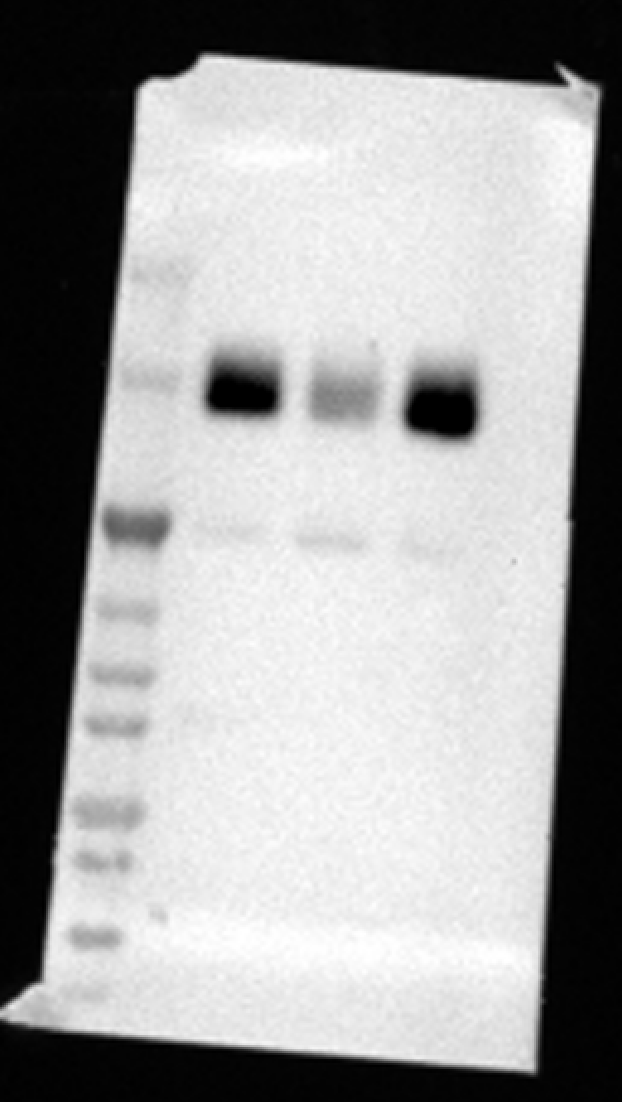

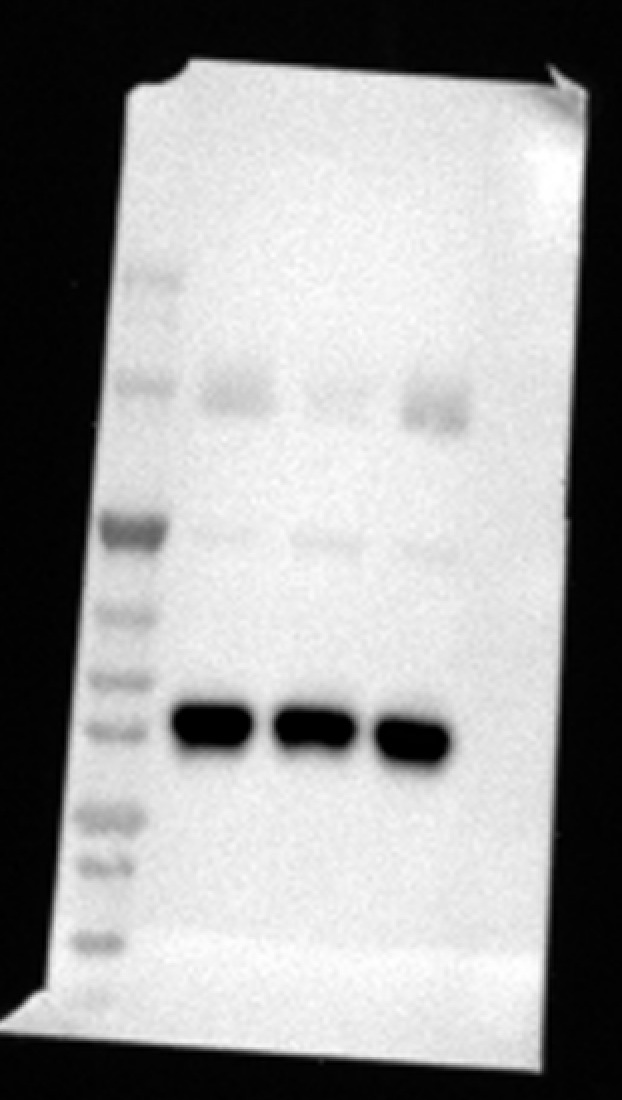


1. ADAM10 and GAPDH


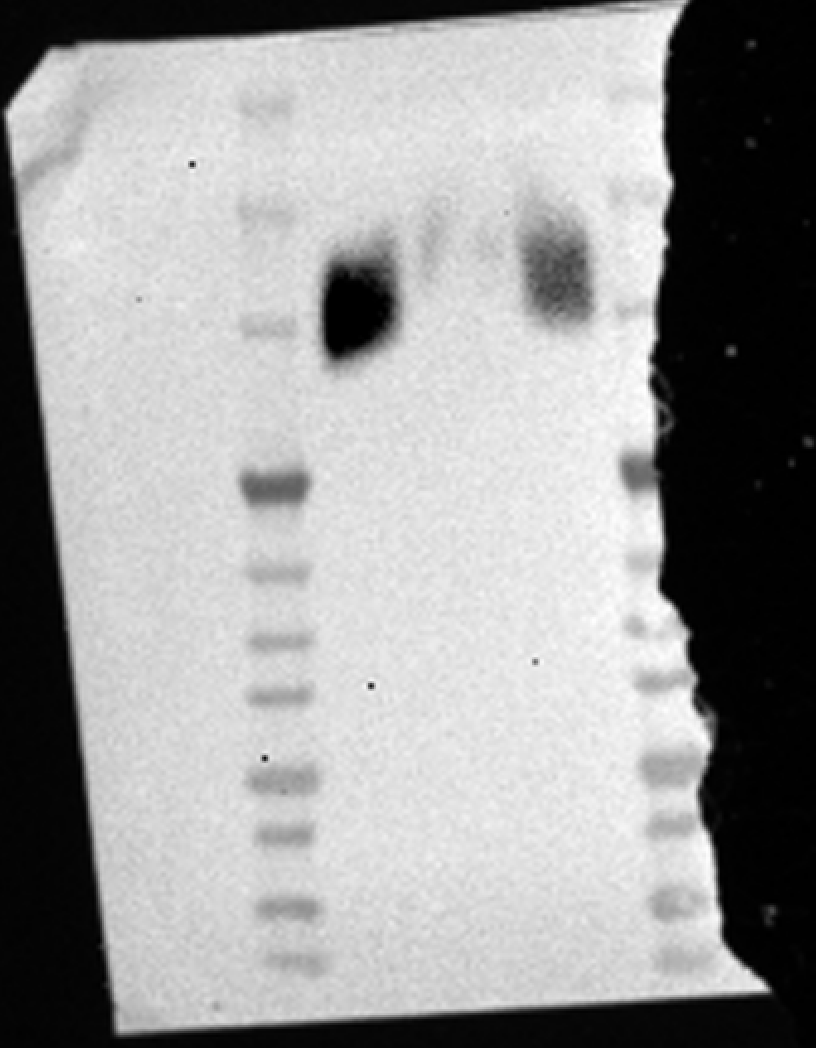

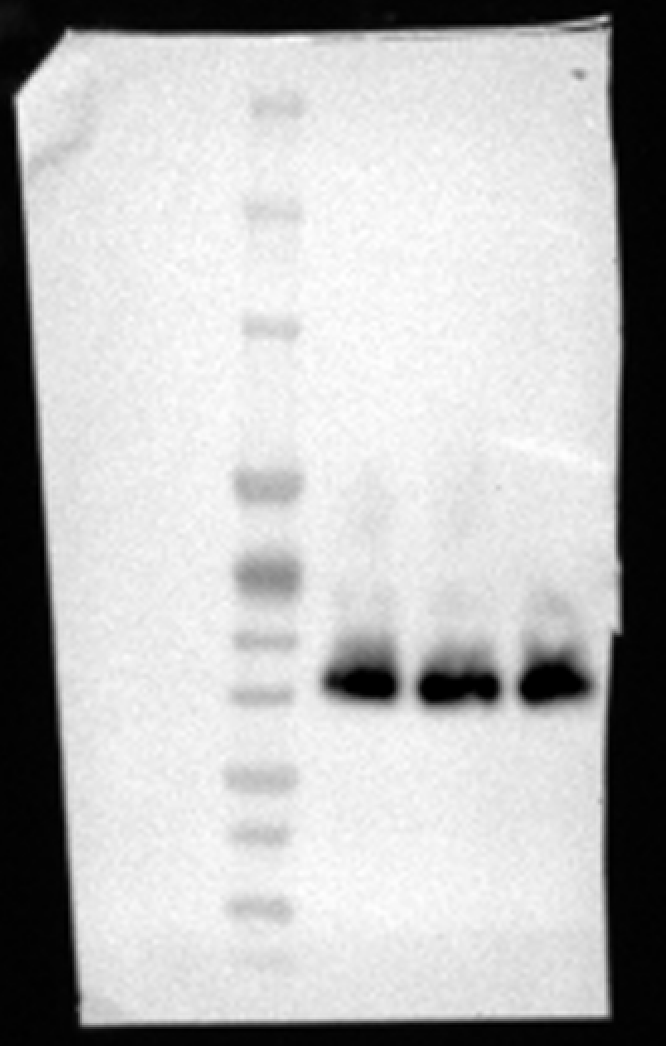


1. ADAM10 and GAPDH


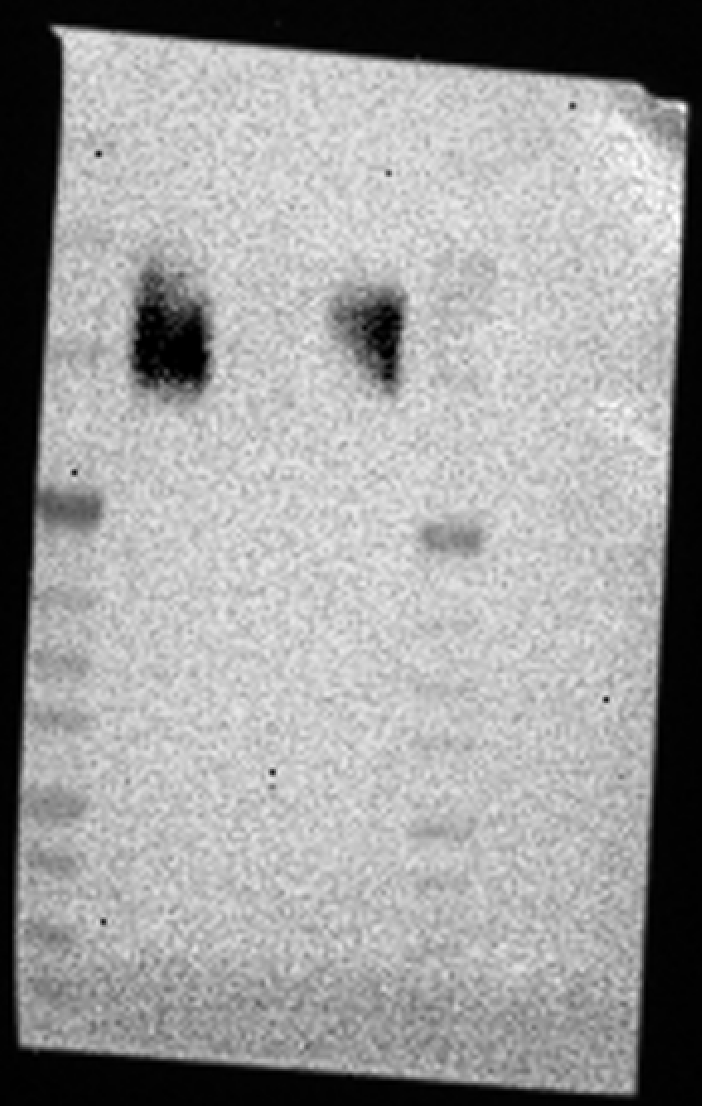

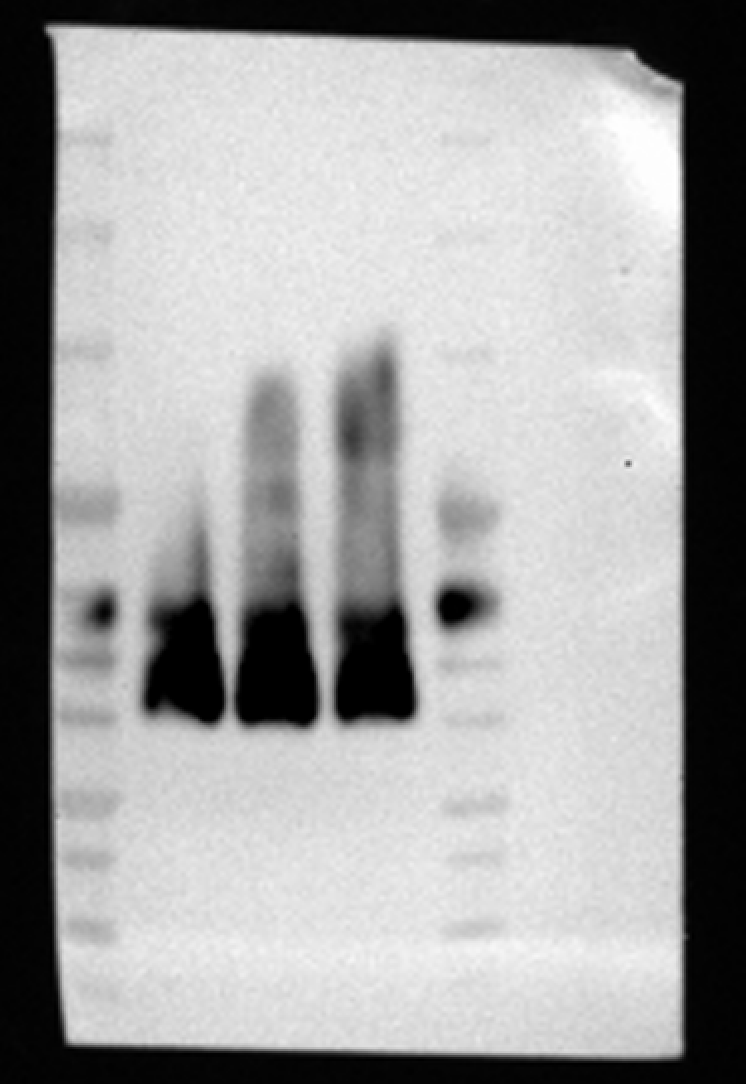

Supplement: Supplementary file 1 [file ed192976f168f9c94697738c.docx]
